# Supplementary material for: Placebo can enhance creativity
Source: PLoS One. 2017 Sep 11;12(9):e0182466. doi: 10.1371/journal.pone.0182466 (PMC5593173; doi:10.1371/journal.pone.0182466)
Supplement: S2 Table — Values above the diagonal represent Spearman correlation coefficients, values below the diagonal represent corresponding p values (not corrected). (XLSX) [file pone.0182466.s003.xlsx]

## Sheet: Sheet1
coefficients/p values		TTCT			AUT			CFG
		fluency	flexibility	originality	fluency	flexibility	originality	fluency	flexibility	originality	OB
TTCT	fluency	-	0.939382	0.422541	0.123707	0.109679	0.072165	0.125387	-0.0944066	-0.122386	-0.0819541
	flexibility	3.07756e-27	-	0.398278	-0.0250433	-0.0348799	-0.0498598	0.0522587	-0.082859	-0.0688567	-0.0559877
	originality	0.0010594	0.00215241	-	0.190168	0.212332	0.165968	0.266709	0.217023	-0.0304196	0.134721
AUT	fluency	0.359244	0.853297	0.156513	-	0.988321	0.857805	0.196322	0.173918	0.177116	0.164882
	flexibility	0.416697	0.79673	0.112807	1.24962e-46	-	0.876031	0.191218	0.18953	0.215321	0.19897
	originality	0.593716	0.712632	0.21726	1.5685e-17	4.62586e-19	-	0.0824079	0.135281	0.209314	0.181072
CFG	fluency	0.352708	0.699447	0.0449111	0.14329	0.154197	0.542246	-	0.679259	0.206053	0.214608
	flexibility	0.484848	0.54003	0.104893	0.195718	0.157935	0.315695	6.29834e-09	-	0.486998	0.463727
	originality	0.36444	0.610791	0.82227	0.187498	0.107713	0.118138	0.124109	0.000122248	-	0.235187
	OB	0.54448	0.679125	0.317723	0.220325	0.137864	0.177674	0.108913	0.00028012	0.0782246	-
